# Supplementary material
Source: PubMed Central journal article supplement (PMC4863069)

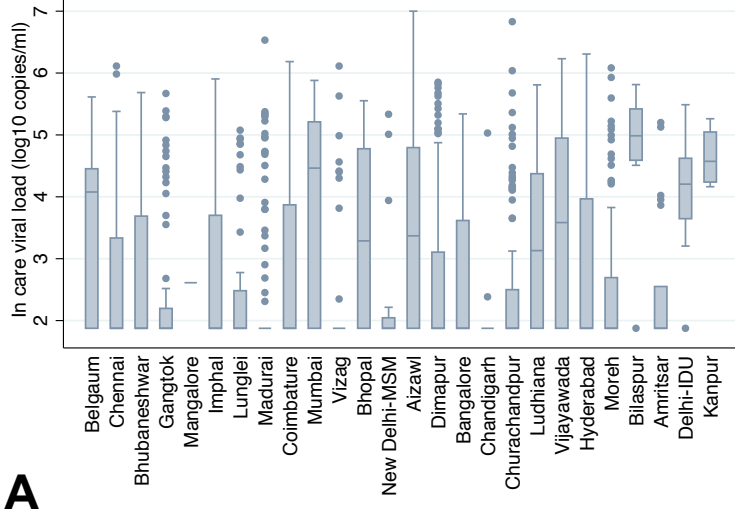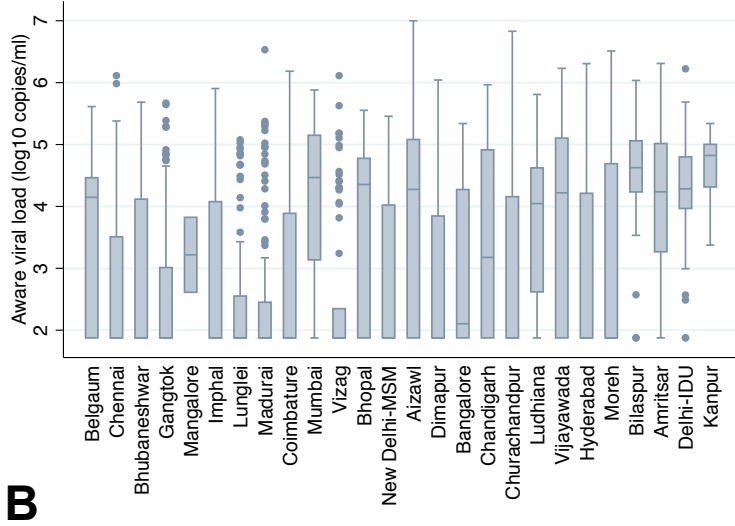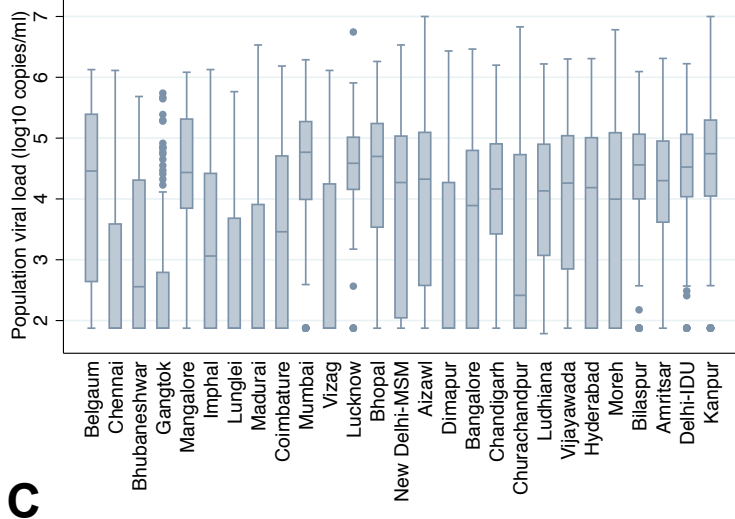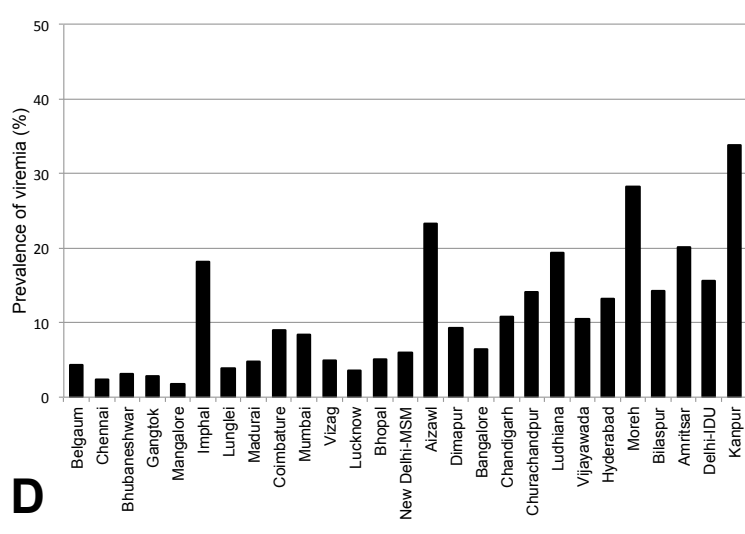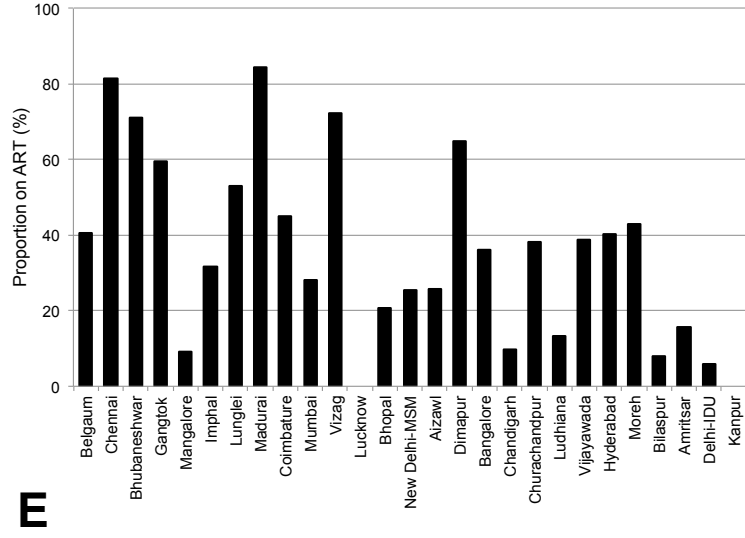

Supplement: NIHMS768536-supplement-1.pdf [file NIHMS768536-supplement-1.pdf]

### MSM SITES

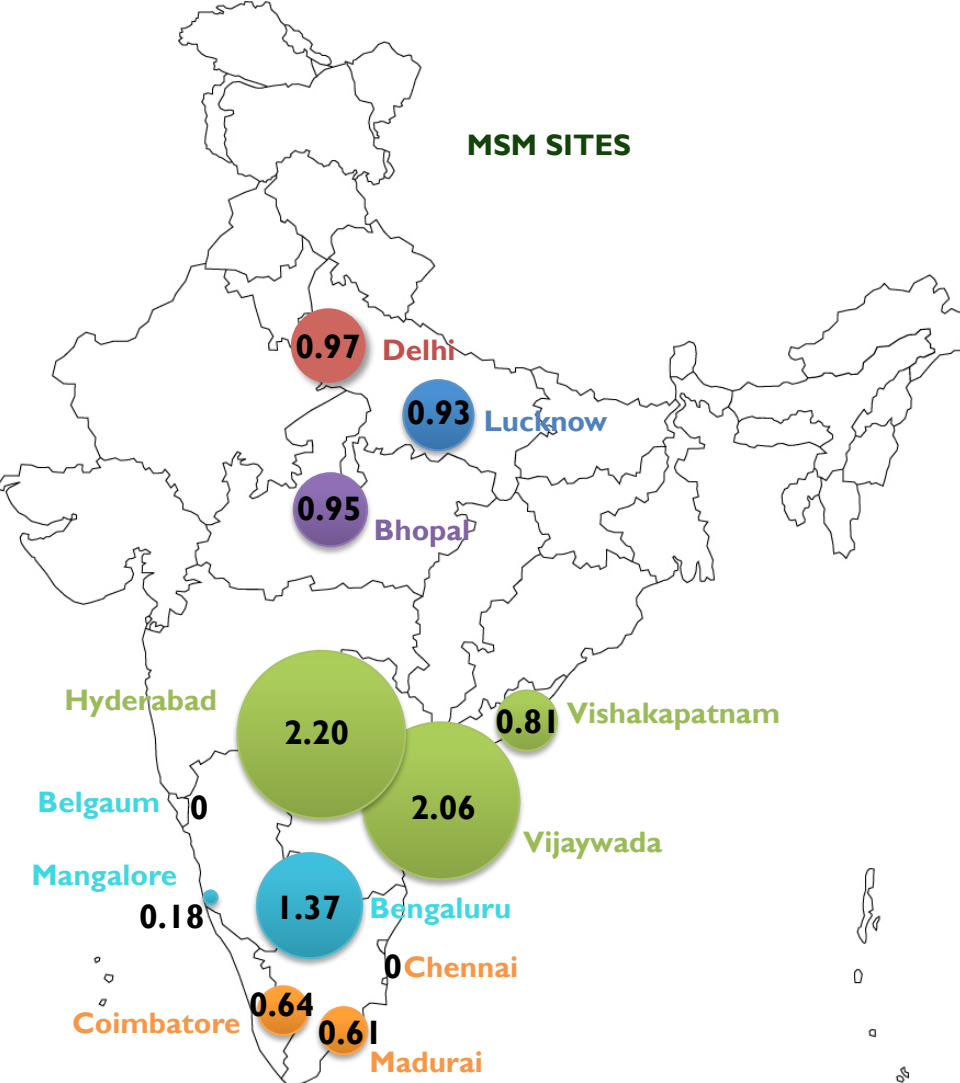

### PWID SITES

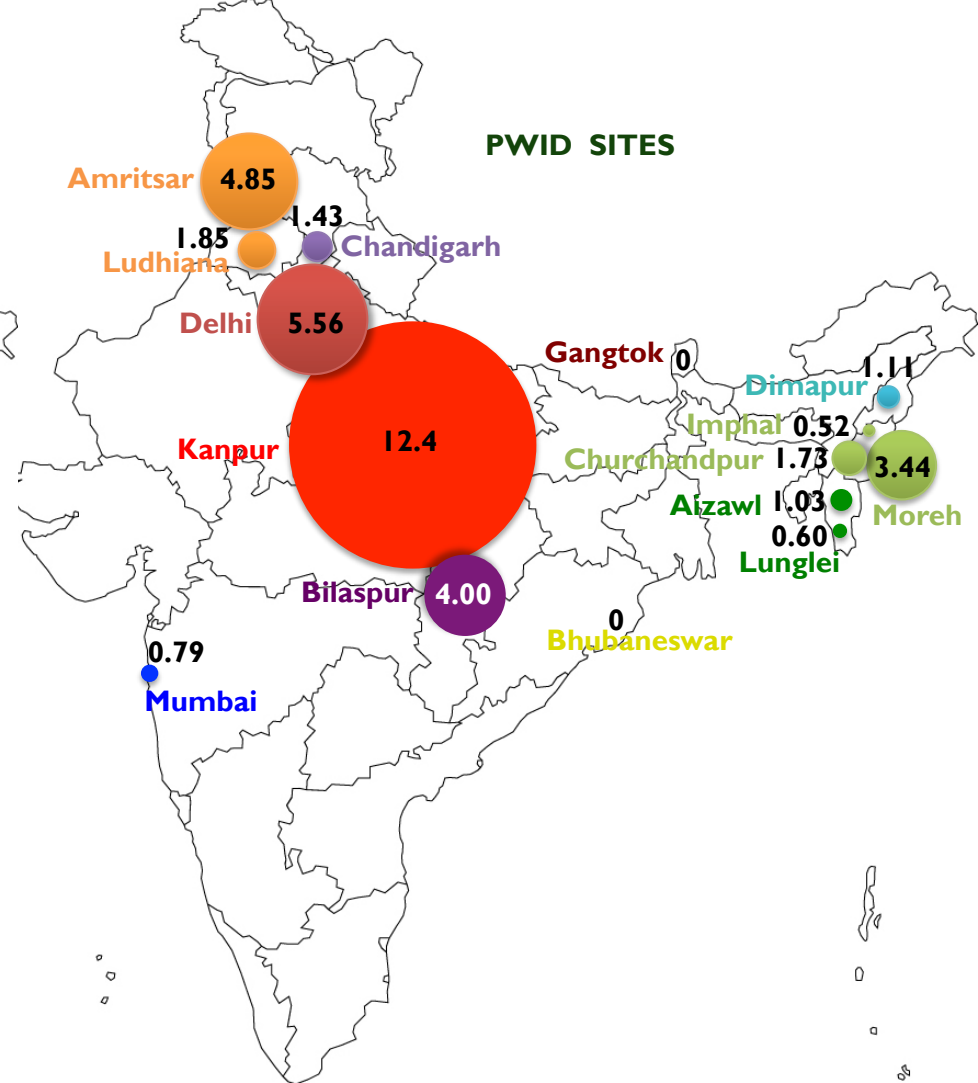

Supplement: NIHMS768536-supplement-2.pdf [file NIHMS768536-supplement-2.pdf]
